# Supplementary material for: BMI1 inhibits senescence and enhances the immunomodulatory properties of human mesenchymal stem cells via the direct suppression of MKP-1/DUSP1
Source: PubMed Central journal article supplement (PMC5032689; doi:10.18632/aging.101000), 2016-07-22
Supplement: aging-08-1670-s001.pdf [file aging-08-1670-s001.pdf]

**SUPPLEMENTARY DATA**

**A**

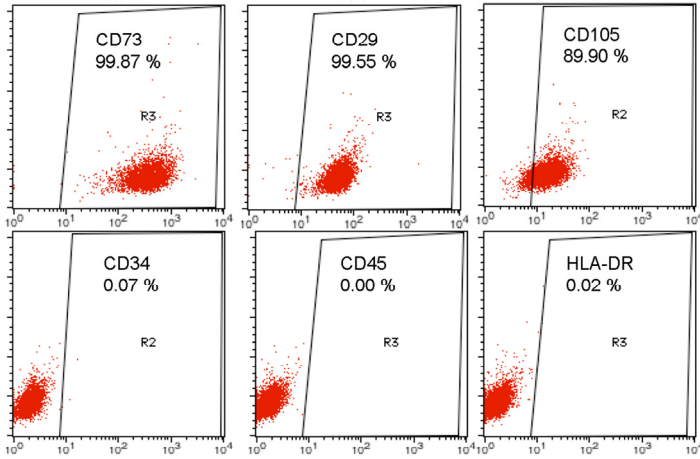

**B**

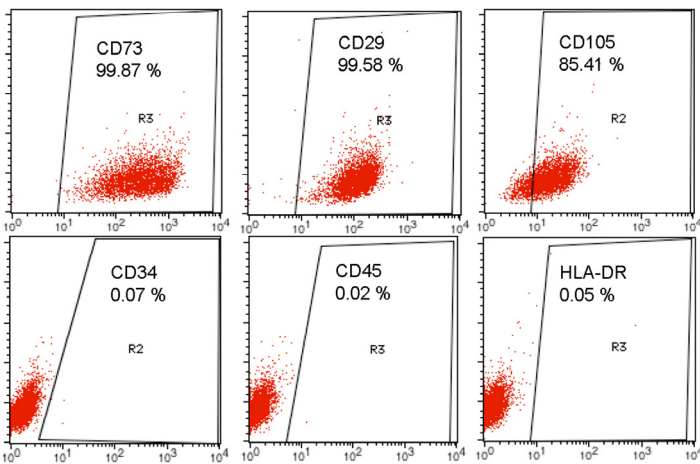

**C**

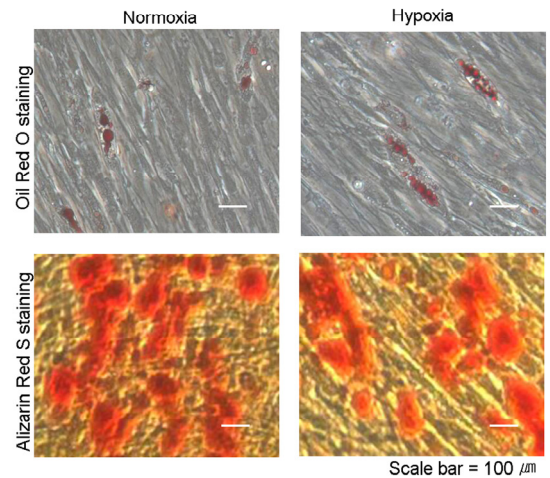

**Supplementary Figure S1. Characterization of hUCB-MSCs cultured in normoxia and hypoxia.** Normoxic (A)- and hypoxic (B)-cultured hUCB-MSCs ( $1 \times 10^6$  cells/ml) were stained with FITC- or PE-conjugated antibodies specific for human CD29, CD34, CD45, CD73, CD105, and HLA-DR. (C) Images of differentiated hUCB-MSCs after induction into specific tissues. Lipid droplet accumulation in differentiated cells was visualized using Oil Red O staining after 2.5 weeks of adipogenic induction. Calcium deposits were stained with Alizarin Red S after 2.5 weeks of osteogenic induction. The results show 1 representative sample from of 3 independent experiments.

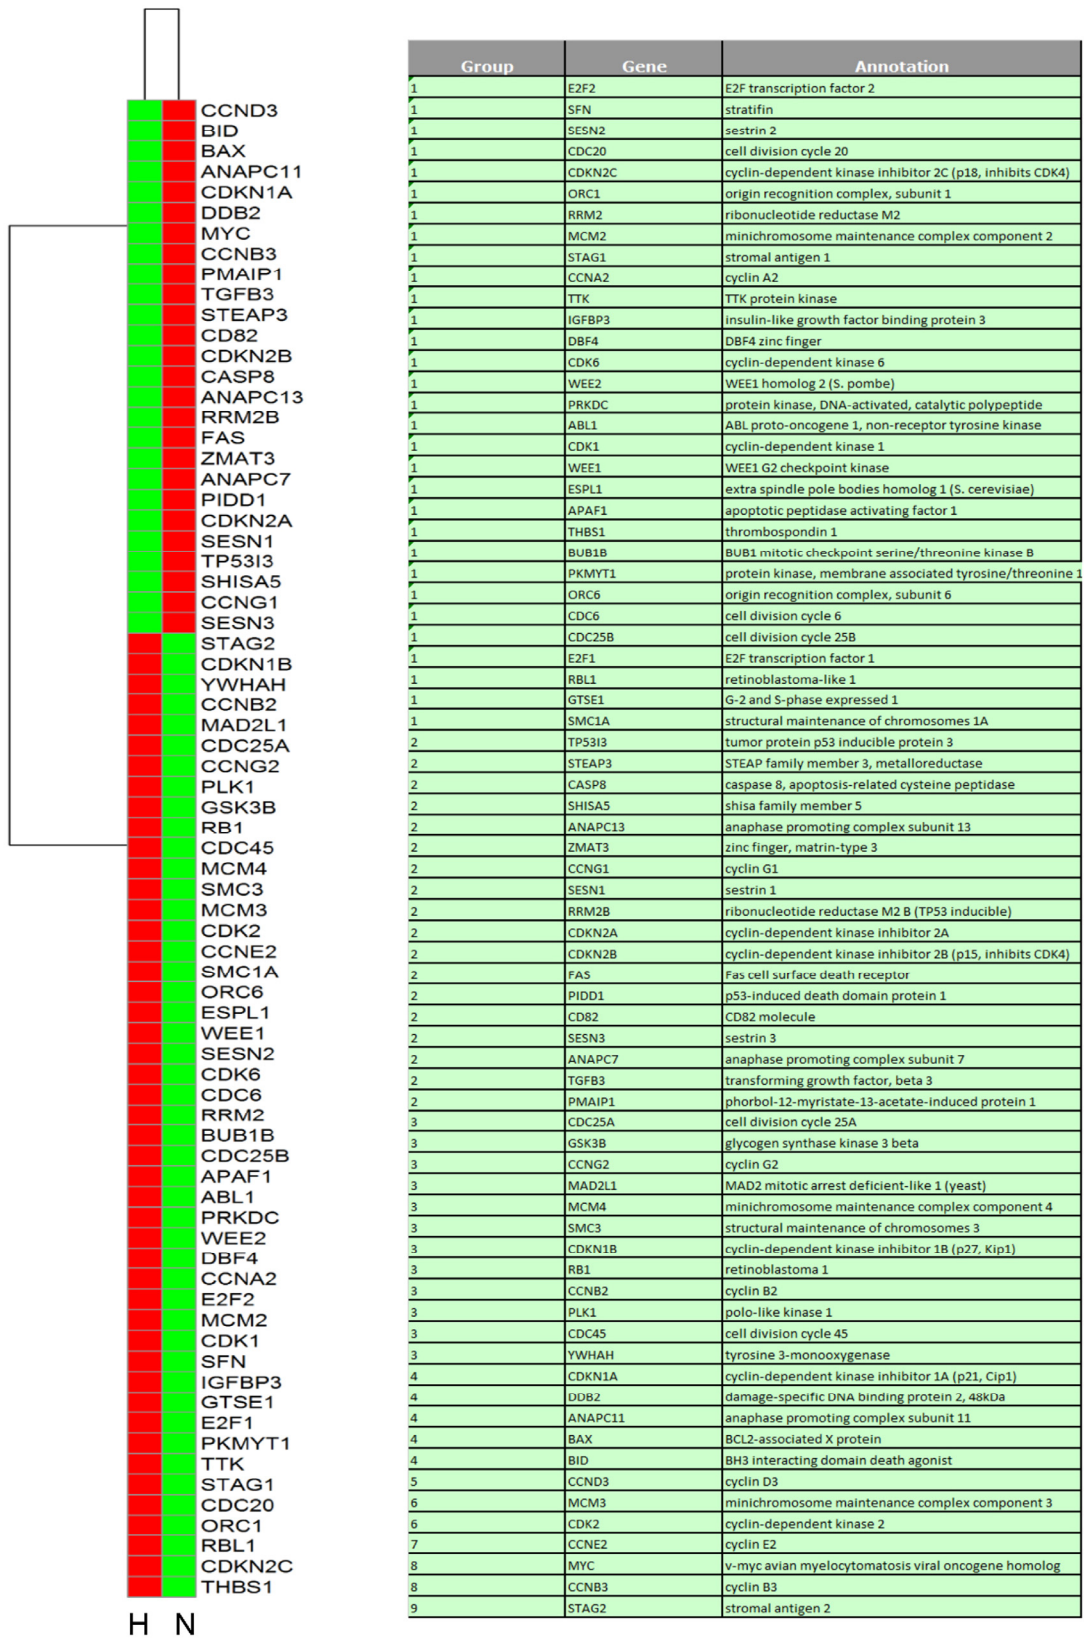

Supplementary Figure S2. Hierarchical clustering analysis of normoxic- and hypoxic-cultured hUCB-MSCs.

**A**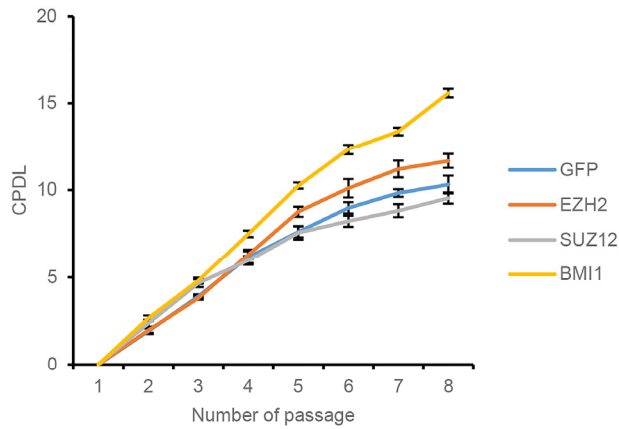**B**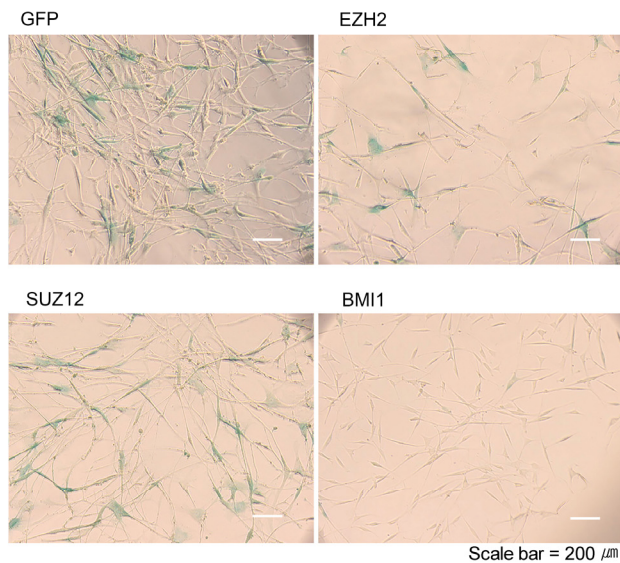**C**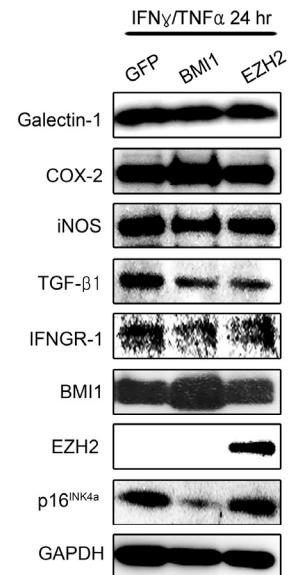

**Supplementary Figure S3. Among the polycomb group proteins, BMI1 most effectively inhibits cellular senescence and improves the expression of COX-2.** (A) After the overexpression of GFP, EZH2, SUZ12 and BMI1, hUCB-MSCs were subcultured and CPDLs were calculated. (B) After several passages, SA-β-gal staining was conducted to assess the senescent state of hUCB-MSCs overexpressing each factor. (C) GFP-, BMI1- and EZH2-transduced hUCB-MSCs were treated with IFN-γ and TNF-α for 24 hours, and western blot analyses were conducted to investigate the effects of the immunomodulatory proteins and COX-2 expression.

**Table S1. Primers used in qRT-PCR and ChIP assay**

qPCR Primers used for mRNA expression analysis

| Target   | Forward                | Reverse               |
|----------|------------------------|-----------------------|
| BMI1     | GACTCTGGGAGTGACAAGGC   | AGATTGGTGGTTACCGCTGG  |
| p16INK4a | GAAGGTCCCTCAGACATCCC   | CCCTGTAGGACCTTCGGTGA  |
| DUSP1    | CTGCCCTTTCTGTACCTGGG   | GGTTGTCCTCCACAGGGATG  |
| GAPDH    | TGATGACATCAAGAAGGTGGTG | ACCCTGTTGCTGTAGCCAAAT |

qPCR Primers used for ChIP analysis

| Location                         | Forward              | Reverse              |
|----------------------------------|----------------------|----------------------|
| p16INK4a promoter (-38 ~ -158)   | GCACTCAAACACGCCTTTGC | AGAGCCAGCGTTGGCAAGGA |
| DUSP1 promoter 1 (-1815 ~ -1717) | GCGCCCAGCTCTTAAAAAGT | CCGACTTGATTTGTCCCATT |
| DUSP1 promoter 2 (-662 ~ -543)   | GCTCGAGTCGGTCTTGGTAG | GACTTGCCCAGAACCACACT |
| DUSP1 promoter 3 (-106 ~ -16)    | CCGTCACGTGATCACCATT  | GCGTTTATATGCGGCCTCT  |
